# Supplementary material for: How to Measure Human-Dog Interaction in Dog Assisted Interventions? A Scoping Review
Source: MDPI journal article supplement (doi:10.3390/ani14030410), 2024-01-26
Supplement: s1 [file s1]

**Table S1:** data charting of included articles

| ShortTitle                  | Title                                                                                                                                                   | Journal                                               | Country             | Geographical region | What is measured | Kind of measure                  | How is measured                                                                                                                                                                                                                                                              | Focus                            | Point of view         | Context                                             |
|-----------------------------|---------------------------------------------------------------------------------------------------------------------------------------------------------|-------------------------------------------------------|---------------------|---------------------|------------------|----------------------------------|------------------------------------------------------------------------------------------------------------------------------------------------------------------------------------------------------------------------------------------------------------------------------|----------------------------------|-----------------------|-----------------------------------------------------|
| <b>Ambrosi (2019)</b>       | Randomized controlled study on the effectiveness of animal-assisted therapy on depression, anxiety, and illness perception in institutionalized elderly | Psychogeriatrics                                      | Italy               | Europe              | Interaction      | Observation/Behavioural analysis | Frequency of verbal (speaking, sounds, vocalizations) and nonverbal (petting, stroking, throwing food or toy) interactions towards the dog                                                                                                                                   | Participant > dog                | Observer/experimenter | DAI/DAI simulation                                  |
| <b>Ávila-Álvarez (2020)</b> | Improving social participation of children with autism spectrum disorder: Pilot testing of an early animal-assisted intervention in Spain               | Health and Social Care in the Community               | Spain               | Europe              | Interaction      | Questionnaire/Scale              | AAT Flow Sheet (9 items) includes frequency of child–dog social relationships (6 items: looked at dog, touched dog, spoke to dog, remembered and used dog’s name, engaged in activity with dog, reminisced about own dog). Likert-type responses                             | Participant > dog                | Observer/experimenter | DAI/DAI simulation                                  |
| <b>Banks (2008)</b>         | Animal-Assisted Therapy and Loneliness in Nursing Homes: Use of Robotic versus Living Dogs                                                              | Journal of the American Medical Directors Association | USA                 | North America       | Bond             | Questionnaire/Scale              | Lexington Attachment to Pets Scale (LAPS) modified (MLAPS)                                                                                                                                                                                                                   | Participant > dog                | Participant           | DAI/DAI simulation                                  |
| <b>Beetz (2012)</b>         | Effects of social support by a dog on stress modulation in male children with insecure attachment                                                       | Frontiers in Psychology                               | Germany and Austria | Europe              | Interaction      | Observation/Behavioural analysis | Behaviours of the participant and his interaction with the dog. Frequencies and/or durations, 49 variables considered                                                                                                                                                        | Participant > dog                | Observer/experimenter | TEST Trier Social Stress Test for Children (TSST-C) |
| <b>Berry (2012)</b>         | Developing effective animal-assisted intervention programs involving visiting dogs for institutionalized geriatric patients: A pilot study              | Psychogeriatrics                                      | Italy               | Europe              | Interaction      | Observation/Behavioural analysis | Occurrences of activities and social interactions with the dog (ethogram), coded as spontaneous/mediated by the handler. Interactions are: “looking at”, “talking to” or touching the dog. Also frequency of smile episodes and their co-occurrence with social interactions | Participant > dog                | Observer/experimenter | DAI/DAI simulation                                  |
| <b>Bidoli (2022)</b>        | Dogs working in schools–Safety awareness and animal welfare                                                                                             | Journal of Veterinary Behavior                        | Germany             | Europe              | Interaction      | Observation/Behavioural analysis | Ethogram of the dog with general physical activity behaviour measured in duration of occurrence (state) and more specific behaviour, divided into a dozen of categories (including interaction with the participant),                                                        | Dog <> participant (and teacher) | Observer/experimenter | DAI/DAI simulation                                  |

|                        |                                                                                                                        |                                                       |           |               |             |                                  |                                                                                                                                                                                                                                                                                                                                                                                      |                                      |                       |                                                                                                 |
|------------------------|------------------------------------------------------------------------------------------------------------------------|-------------------------------------------------------|-----------|---------------|-------------|----------------------------------|--------------------------------------------------------------------------------------------------------------------------------------------------------------------------------------------------------------------------------------------------------------------------------------------------------------------------------------------------------------------------------------|--------------------------------------|-----------------------|-------------------------------------------------------------------------------------------------|
|                        |                                                                                                                        |                                                       |           |               |             |                                  | documented in terms of duration of occurrence (state) or frequency (event). Interaction of the participant with the dog registered as well. Moreover, each behaviour (both from canine and human part) scored with 1 point and assigned to 1 of the following categories: "Critical"; "Problematic"; "Innocuous". Detailed description of the interactions considered in the article |                                      |                       |                                                                                                 |
| <b>Caprilli (2006)</b> | Animal-assisted activity at A. Meyer children's hospital: A pilot study                                                | Evidence-based Complementary and Alternative Medicine | Italy     | Europe        | Interaction | Questionnaire/Scale              | Scale n.1 (child-animal interaction): 9 items (brushing; ordering the dog; petting; playing; nourishing; talking; taking; walking; watching) with 4 scores (active, active if solicited, resistant, passive)                                                                                                                                                                         | Participant > dog                    | Observer/experimenter | DAI/DAI simulation                                                                              |
| <b>Carballo (2020)</b> | Assistance and Therapy Dogs Are Better Problem Solvers Than Both Trained and Untrained Family Dogs                     | Frontiers in Veterinary Science                       | Hungary   | Europe        | Interaction | Observation/Behavioural analysis | Grazing frequency                                                                                                                                                                                                                                                                                                                                                                    | Dog > participant/experimenter       | Observer/experimenter | TEST problem solving task                                                                       |
| <b>Cavalli (2018)</b>  | Are animal-assisted activity dogs different from pet dogs? A comparison of their sociocognitive abilities              | Journal of Veterinary Behavior                        | Argentina | South America | Interaction | Observation/Behavioural analysis | Duration of time close and physical contact (sociability test) and gazing duration (gazing test)                                                                                                                                                                                                                                                                                     | Dog > experimenter                   | Observer/experimenter | TEST 3 behavioural tasks (sociability test, gazing test, and A-not-B task)                      |
| <b>Cavalli (2019)</b>  | Persistence in learned responses: A comparison of Animal Assisted Intervention and pet dogs                            | Journal of Veterinary Behavior                        | Argentina | South America | Interaction | Observation/Behavioural analysis | Gazing time in gazing test                                                                                                                                                                                                                                                                                                                                                           | Dog > experimenter                   | Observer/experimenter | TEST two sociocognitive tasks (gazing and object choice) and a nonsocial task (problem-solving) |
| <b>Cavalli (2020)</b>  | Gazing as a help requesting behavior: a comparison of dogs participating in animal-assisted interventions and pet dogs | Animal Cognition                                      | Argentina | South America | Interaction | Observation/Behavioural analysis | Gazing time, latency and direction of first gaze, frequency of gaze alternation, contact with the people                                                                                                                                                                                                                                                                             | Dog > handler/owner and experimenter | Observer/experimenter | TEST unsolvable task                                                                            |

|                         |                                                                                                                                                |                                               |           |               |                  |                                   |                                                                                                                                                                                                                                                      |                           |                       |                          |
|-------------------------|------------------------------------------------------------------------------------------------------------------------------------------------|-----------------------------------------------|-----------|---------------|------------------|-----------------------------------|------------------------------------------------------------------------------------------------------------------------------------------------------------------------------------------------------------------------------------------------------|---------------------------|-----------------------|--------------------------|
| <b>Cavalli (2020)</b>   | Showing behavior in Animal Assisted Intervention and pet dogs                                                                                  | Behavioral processes                          | Argentina | South America | Interaction      | Observation /Behavioural analysis | Behaviours towards the owner: gazing, gaze alternation, other behaviours                                                                                                                                                                             | Dog > handler/owner       | Observer/experimenter | TEST showing task        |
| <b>Cavalli (2023)</b>   | Still-face effect in domestic dogs: comparing untrained with trained and animal assisted interventions dogs                                    | Learning & Behavior                           | Argentina | South America | Interaction      | Observation /Behavioural analysis | Affiliative behaviours (proximity, contact, gazing, licking) and presence of begging behaviours. Owner's effusiveness: frequency in which owner spoke to the dog, tone of voice, intensity of petting                                                | Dog <> handler/owner      | Observer/experimenter | TEST Still face test     |
| <b>Chubak (2017)</b>    | Pilot Study of Therapy Dog Visits for Inpatient Youth With Cancer                                                                              | Journal of Pediatric Oncology Nursing         | USA       | North America | Interaction      | Observation /Behavioural analysis | Semi structured form developed for the study considering also interactions with the dog such as petting, playing, brushing, hugging, talking, watching, going out of bed to interact with the dog, dog getting onto bed or onto patient's lap, other | Participant <> dog        | Observer/experimenter | DAI/DAI simulation       |
| <b>Corsetti (2019)</b>  | Evaluating Stress in Dogs Involved in Animal-Assisted Interventions                                                                            | Animals                                       | Italy     | Europe        | Interaction      | Observation /Behavioural analysis | Dog ethogram of 53 behavioural patterns gathered into 6 categories, with some interaction behaviours (e.g. looking, requesting attention). Details of the ethogram in the Appendix of the article.                                                   | Dog > participant/handler | Observer/experimenter | DAI/DAI simulation       |
| <b>Csepregi (2023)</b>  | Factors Contributing to Successful Spontaneous Dog-Human Cooperation                                                                           | Animals                                       | Hungary   | Europe        | Interaction      | Observation /Behavioural analysis | Attentiveness (closeness, orienting at owner, gazing)                                                                                                                                                                                                | Dog > handler/owner       | Observer/experimenter | TEST 'out-of-reach' task |
| <b>Dell (2019)</b>      | Animal-assisted therapy in a Canadian psychiatric prison                                                                                       | International Journal of Prisoner Health      | Canada    | North America | Interaction/bond | Questionnaire/Scale               | Likert rating of the experience with the dog - perceived interaction (also measure of bond)                                                                                                                                                          | Participant > dog         | Participant           | DAI/DAI simulation       |
| <b>Friedmann (2019)</b> | Relationship of Behavioral Interactions during an Animal-assisted Intervention in Assisted Living to Health-related Outcomes                   | Anthrozoös                                    | USA       | North America | Interaction      | Observation /Behavioural analysis | Percent of sessions the participant attended in which occurred looking at, touching, brushing, talking to, walking with, and giving treats to the dog                                                                                                | Participant > dog         | Observer/experimenter | DAI/DAI simulation       |
| <b>Funahashi (2014)</b> | Brief Report: The Smiles of a Child with Autism Spectrum Disorder During an Animal-assisted Activity May Facilitate Social Positive Behaviors— | Journal of Autism and Developmental Disorders | Japan     | Asia          | Interaction      | Observation /Behavioural analysis | Smiles, positive social behaviours (watching the dog, voluntarily touching the dog, dog coming up to the knee, holding the dog, verbal communication with the dog) and negative social behaviours (escaping,                                         | Participant > dog         | Observer/experimenter | DAI/DAI simulation       |

|                         |                                                                                                                                             |                                                                  |                 |               |             |                                                      |                                                                                                                                                                                                                                            |                           |                              |                    |
|-------------------------|---------------------------------------------------------------------------------------------------------------------------------------------|------------------------------------------------------------------|-----------------|---------------|-------------|------------------------------------------------------|--------------------------------------------------------------------------------------------------------------------------------------------------------------------------------------------------------------------------------------------|---------------------------|------------------------------|--------------------|
|                         | Quantitative Analysis with Smile-detecting Interface                                                                                        |                                                                  |                 |               |             |                                                      | outside of the circle, anxiety and anger)                                                                                                                                                                                                  |                           |                              |                    |
| <b>Gee (2015)</b>       | Does Physical Contact with a Dog or Person Affect Performance of a Working Memory Task?                                                     | Anthrozoös                                                       | USA             | North America | Interaction | Questionnaire/Scale                                  | 11 item self-report dog evaluation form: comfort, discomfort, ambivalence, desire to interact with the dog + experimenter rating of participant's comfort level with the dog (Likert scale)                                                | Participant > dog         | Participant and experimenter | DAI/DAI simulation |
| <b>Germone (2019)</b>   | Animal-assisted activity improves social behaviors in psychiatrically hospitalized youth with autism                                        | Autism                                                           | USA             | North America | Interaction | Observation/Behavioural analysis with coding system  | Timed interval coding tool OHAIRE - considers also interactions with animals, e.g. talk, gesture, look, touch, affection, prosocial behaviour                                                                                              | Participant > dog         | Observer/experimenter        | DAI/DAI simulation |
| <b>Glenk (2014)</b>     | Salivary cortisol and behavior in therapy dogs during animal-assisted interventions: A pilot study                                          | Journal of Veterinary Behavior                                   | Austria         | Europe        | Interaction | Observation/Behavioural analysis                     | Dog behaviour - Frequency and durations, including response to human action (takes a treat/obeys to command)                                                                                                                               | Dog > participant         | Observer/experimenter        | DAI/DAI simulation |
| <b>Griffioen (2019)</b> | Changes in behavioural synchrony during dog-assisted therapy for children with autism spectrum disorder and children with Down syndrome     | Journal of Applied Research in Intellectual Disabilities (JARID) | The Netherlands | Europe        | Interaction | Observation/Behavioural analysis                     | Coding of movement direction of the participant and the dog. Synchronous movement patterns of participants and dogs. Time series of the participants and dog's movement directions subjected to cross-recurrence quantification analysis   | Participant <> dog        | Observer/experimenter        | DAI/DAI simulation |
| <b>Grigore (2014)</b>   | Interaction with a Therapy Dog Enhances the Effects of Social Story Method in Autistic Children                                             | Society and Animals                                              | Romania         | Europe        | Interaction | Observation/Behavioural analysis                     | Frequency of appropriate and initiated social interactions and level of prompt needed. Initiated social interactions include approaching the dog                                                                                           | Participant > dog         | Observer/experimenter        | DAI/DAI simulation |
| <b>Guérin (2018)</b>    | Reliability and Validity Assessment of the Observation of Human-Animal Interaction for Research (OHAIRE) Behavior Coding Tool               | Frontiers in Veterinary Science                                  | USA             | North America | Interaction | Observation/Behavioural analysis with coding system  | Timed interval coding tool OHAIRE - considers also interactions with animals, e.g. talk, gesture, look, touch, affection, prosocial behaviour                                                                                              | Participant > dog         | Observer/experimenter        | DAI/DAI simulation |
| <b>Hill (2023)</b>      | Investigating Dog Welfare When Interacting with Autistic Children within Canine-Assisted Occupational Therapy Sessions: A Single Case Study | Animals                                                          | Australia       | Australia     | Interaction | Observation/Behavioural analysis with tool/checklist | Behavioural Instrument for the Assessment of Dog Well-Being Before/During/After Therapy Sessions, checklist of ten items including therapy dog's interaction with people. Each item scored 0-3 depending on the severity of the behaviour. | Dog > participant/handler | Observer/experimenter        | DAI/DAI simulation |

|                      |                                                                                                                              |                                     |       |               |             |                                                        |                                                                                                                                                                                                                                                                                             |                                             |                       |                    |
|----------------------|------------------------------------------------------------------------------------------------------------------------------|-------------------------------------|-------|---------------|-------------|--------------------------------------------------------|---------------------------------------------------------------------------------------------------------------------------------------------------------------------------------------------------------------------------------------------------------------------------------------------|---------------------------------------------|-----------------------|--------------------|
| <b>Holt (2015)</b>   | Animal Assisted Activity with Older Adult Retirement Facility Residents: The PAWSitive Visits Program                        | Activities, Adaptation & Aging      | USA   | North America | Bond        | Questionnaire/Scale                                    | Center for the Study of Animal Wellness Pet Bonding Scale (CSAW-PBS)                                                                                                                                                                                                                        | Participant > dog                           | Participant           | DAI/DAI simulation |
| <b>Kaiser (2002)</b> | A Dog and a "Happy Person" Visit Nursing Home Residents                                                                      | Western Journal of Nursing Research | USA   | North America | Interaction | Observation /Behavioural analysis                      | Frequencies and/or durations. Behaviours initiated by participant: nonverbal behaviours included shaking hands, patting, disengaging, affection, moving closer, and commands. Behaviours initiated by the visitor (dog): shaking paw/hands, patting/petting, disengaging, and moving closer | Participant <> dog                          | Observer/experimenter | DAI/DAI simulation |
| <b>Kline (2020)</b>  | Randomized Trial of Therapy Dogs Versus Deliberative Coloring (Art Therapy) to Reduce Stress in Emergency Medicine Providers | Academic Emergency Medicine         | USA   | North America | Interaction | Observation /Behavioural analysis with evaluation form | Interaction with the dog: touch (Yes or No); Grade the interaction with the dog (Likert 1-5); time of interaction                                                                                                                                                                           | Participant > dog                           | Handler/observer      | DAI/DAI simulation |
| <b>Koda (2015)</b>   | Stress levels in dogs, and its recognition by their handlers, during animal-assisted therapy in a prison                     | Animal Welfare                      | Japan | Asia          | Interaction | Questionnaire/Scale                                    | Behavioural items in 3 behavioural categories (stressful, relaxed, positive emotional) some of which focused on the interaction with handler and participant, e.g. depending excessively on the handler, interacting in a friendly way                                                      | Dog > participant/handler and other members | Dog owner/handler     | DAI/DAI simulation |
| <b>Koda (2015)</b>   | Effects of a Dog-assisted Program in a Japanese Prison                                                                       | Asian Journal of Criminology        | Japan | Asia          | Interaction | Questionnaire/Scale                                    | Questionnaires to evaluate participant-dog interaction (tenderness toward the dogs, quantity of talking, willingness to have contact with the dogs, interest in the dogs and ease of interaction) and handler-dog interaction (handling)                                                    | Participant/handler > dog                   | Dog owner/handler     | DAI/DAI simulation |
| <b>Koda (2016)</b>   | Effects of a Dog-Assisted Intervention Assessed by Salivary Cortisol Concentrations in Inmates of a Japanese Prison          | Asian Journal of Criminology        | Japan | Asia          | Interaction | Questionnaire/Scale                                    | Questionnaire on interactional skills of inmates (Likert scale)                                                                                                                                                                                                                             | Participant > dog                           | Dog owner/handler     | DAI/DAI simulation |
| <b>Kramer (2009)</b> | Comparison of the effect of human interaction, animal-assisted therapy, and AIBO-assisted therapy on long-                   | Anthrozoös                          | USA   | North America | Interaction | Observation /Behavioural analysis                      | Conversation, touch, looking at others, hand gestures, smiles and laughs (with different categories each), and duration of looks. Total attention obtained summing frequency of                                                                                                             | Participant > dog                           | Observer/experimenter | DAI/DAI simulation |

|                          |                                                                                                                                        |                                                           |        |               |                   |                                                       |                                                                                                                                                                                                                                                                             |                               |                       |                          |
|--------------------------|----------------------------------------------------------------------------------------------------------------------------------------|-----------------------------------------------------------|--------|---------------|-------------------|-------------------------------------------------------|-----------------------------------------------------------------------------------------------------------------------------------------------------------------------------------------------------------------------------------------------------------------------------|-------------------------------|-----------------------|--------------------------|
|                          | term care residents with dementia                                                                                                      |                                                           |        |               |                   |                                                       | interaction behaviours (conversation, look, touch and social gestures)                                                                                                                                                                                                      |                               |                       |                          |
| <b>Kujtkowska (2020)</b> | A pilot study on the qualitative assessment of the impact of human-canine relationships on dogs' susceptibility to stress <sup>1</sup> | Dog Behavior                                              | Poland | Europe        | Relationship/bond | Observation /Behavioural analysis                     | Eye contact between the dog and the owner and dog's compliance with the recall command (grading good, average, poor)                                                                                                                                                        | Dog > handler/owner           | Observer/experimenter | TEST for AAI suitability |
| <b>Kuzara (2019)</b>     | Exploring the Handler-Dog Connection within a University-Based Animal-Assisted Activity                                                | Animals                                                   | USA    | North America | Interaction       | Observation /Behavioural analysis                     | Classification in handler interaction styles. Duration and frequency of dog-directed handler behaviour (i.e. verbal and physical contact). Two dimensions of handlers' dog-directed behaviour emerged (e.g., warmth, control) revealing distinct handler interaction styles | Handler > dog                 | Observer/experimenter | DAI/DAI simulation       |
| <b>Lee (2022)</b>        | Development of a pilot human-canine ethogram for an animal-assisted education programme in primary schools – A case study              | Applied Animal Behaviour Science                          | China  | Asia          | Interaction       | Observation /Behavioural analysis                     | Human-animal interaction ethogram of 51 behavioural items identified from the dog, the handlers, and the students (participants). Full ethogram reported in the article                                                                                                     | Dog <> handler <> participant | Observer/experimenter | DAI/DAI simulation       |
| <b>Martin (2002)</b>     | Animal-Assisted Therapy for Children with Pervasive Developmental Disorders                                                            | Western Journal of Nursing Research                       | USA    | North America | Interaction       | Observation /Behavioural analysis                     | Frequencies and/or durations of interactions (behaviours and verbal), in some cases towards the dog (e.g. touching, giving treats, looking at, talk to)                                                                                                                     | Participant > dog             | Observer/experimenter | DAI/DAI simulation       |
| <b>Marx (2010)</b>       | The Impact of Different Dog-related Stimuli on Engagement of Persons With Dementia                                                     | American Journal of Alzheimer's Disease & Other Dementias | USA    | North America | Interaction       | Observation /Behavioural analysis with tool/checklist | Observational Measurement of Engagement (modified): duration of engagement and attitude toward the stimulus (dog)                                                                                                                                                           | Participant > dog             | Observer/experimenter | DAI/DAI simulation       |
| <b>McCullough (2018)</b> | Physiological and behavioral effects of animal-assisted interventions on therapy dogs in pediatric oncology settings                   | Applied Animal Behaviour Science                          | USA    | North America | Interaction       | Observation /Behavioural analysis                     | Dog ethogram of 26 behaviours divided into three categories: affiliative, moderate stress, and high-stress indicators, with some interaction behaviours (leaning or resting body or head against a person                                                                   | Dog > participant or handler  | Observer/experimenter | DAI/DAI simulation       |

<sup>1</sup> This study was included even if reporting a qualitative assessment as it grades on a scale (good, average, poor) the human-canine relationship, based on observations of eye contact between the dog and the owner, and the dog's compliance with the recall command.

|                        |                                                                                                                                                                                |                                              |        |               |             |                                                      |                                                                                                                                                                                                                                                                                                                                                                                                                                                                                                                                                                                                |                                                  |                       |                                                 |
|------------------------|--------------------------------------------------------------------------------------------------------------------------------------------------------------------------------|----------------------------------------------|--------|---------------|-------------|------------------------------------------------------|------------------------------------------------------------------------------------------------------------------------------------------------------------------------------------------------------------------------------------------------------------------------------------------------------------------------------------------------------------------------------------------------------------------------------------------------------------------------------------------------------------------------------------------------------------------------------------------------|--------------------------------------------------|-----------------------|-------------------------------------------------|
|                        |                                                                                                                                                                                |                                              |        |               |             |                                                      | or object, licking a person...). Full ethogram reported in the article                                                                                                                                                                                                                                                                                                                                                                                                                                                                                                                         |                                                  |                       |                                                 |
| <b>Mezza (2022)</b>    | Process Evaluation of Animal Assisted Therapies with Children: The Role of the Human-Animal Bond on the Therapeutic Alliance, Depth of Elaboration, and Smoothness of Sessions | Mediterranean Journal of Clinical Psychology | Italy  | Europe        | Bond        | Observation /Behavioural analysis with coding system | OHAIRE: Interval behaviour coding to note the presence or absence of a behaviour during 10-second interval. Interactive Behaviours (6 categories of social and communication behaviours directed to adults and animals, namely talking, looking, gesturing, touching, showing affection, and being prosocial); Emotional Display; Interfering Behaviours. Total score relating to the human-animal bond considered: scale (1-6) calculated within the “interactive behaviours” category and obtained by rating the presence or absence of any social interactive behaviours toward the animal. | Participant > dog                                | Observer/experimenter | DAI/DAI simulation                              |
| <b>Mongillo (2015)</b> | Validation of a selection protocol of dogs involved in animal-assisted intervention                                                                                            | Journal of Veterinary Behavior               | Italy  | Europe        | Interaction | Observation /Behavioural analysis                    | Time of interaction and percentage of time of negative interactions (the dog avoids the stranger trying to interact or the dog freezes and stiffens while the stranger interacts)                                                                                                                                                                                                                                                                                                                                                                                                              | Dog > participant/experimenter                   | Observer/experimenter | DAI/DAI simulation                              |
| <b>Mongillo (2017)</b> | Sustained attention to the owner is enhanced in dogs trained for animal assisted interventions                                                                                 | Behavioural Processes                        | Italy  | Europe        | Interaction | Observation /Behavioural analysis                    | Length of uninterrupted gazes and frequency of gaze shifting                                                                                                                                                                                                                                                                                                                                                                                                                                                                                                                                   | Dog > handler/owner and participant/experimenter | Observer/experimenter | TEST baseline attention and selective attention |
| <b>Ng (2014)</b>       | The effect of dog–human interaction on cortisol and behavior in registered animal-assisted activity dogs                                                                       | Applied Animal Behaviour Science             | USA    | North America | Interaction | Observation /Behavioural analysis                    | Ethogram of dog behaviours while petted by the handler (interaction item: licking person)                                                                                                                                                                                                                                                                                                                                                                                                                                                                                                      | Dog > handler/participant                        | Observer/experimenter | DAI/DAI simulation                              |
| <b>Olsen (2019)</b>    | Engagement in elderly persons with dementia attending animal-assisted group activity                                                                                           | Dementia                                     | Norway | Europe        | Interaction | Observation /Behavioural analysis                    | Ethogram. Frequency and duration of interactions with the dog, e.g. conversation, looking, touch, smile, ...                                                                                                                                                                                                                                                                                                                                                                                                                                                                                   | Participant > dog                                | Observer/experimenter | DAI/DAI simulation                              |

|                          |                                                                                                                                            |                                               |         |               |             |                                                       |                                                                                                                                                                                                                                                       |                                                 |                       |                                                   |
|--------------------------|--------------------------------------------------------------------------------------------------------------------------------------------|-----------------------------------------------|---------|---------------|-------------|-------------------------------------------------------|-------------------------------------------------------------------------------------------------------------------------------------------------------------------------------------------------------------------------------------------------------|-------------------------------------------------|-----------------------|---------------------------------------------------|
| <b>Palestrini (2017)</b> | Stress level evaluation in a dog during animal-assisted therapy in pediatric surgery                                                       | Journal of Veterinary Behavior                | Italy   | Europe        | Interaction | Observation /Behavioural analysis                     | Dog interaction with the child, with the handler, with the people, withdrawal (duration). Children's (participant) interactions with the dog recorded in terms of duration of occurrence (states)                                                     | Dog > participant/handler and participant > dog | Observer/experimenter | DAI/DAI simulation                                |
| <b>Pérez-Sáez (2019)</b> | Effects of Dog-Assisted Therapy on Social Behaviors and Emotional Expressions: A Single-Case Experimental Design in 3 People With Dementia | Journal of Geriatric Psychiatry and Neurology | Spain   | Europe        | Interaction | Observation /Behavioural analysis with tool/checklist | Social Behaviour Observation Checklist (SBOC): smile/laugh, looks, physical contact, leans-toward stimulus, and verbalizations towards therapist or dog. Sum of all the social behaviours coded in each session calculated and used as a total score. | Participant > dog                               | Observer/experimenter | DAI/DAI simulation                                |
| <b>Phelps (2008)</b>     | An investigation of the effects of dog visits on depression, mood, and social interaction in elderly individuals living in a nursing home  | Behavioral Interventions                      | USA     | North America | Interaction | Observation /Behavioural analysis                     | Percentage of intervals in which each participant engages in verbal/nonverbal interactions with the dog                                                                                                                                               | Participant > dog                               | Observer/experimenter | DAI/DAI simulation                                |
| <b>Piotti (2021)</b>     | Personality and Cognitive Profiles of Animal-Assisted Intervention Dogs and Pet Dogs in an Unsolvable Task                                 | Animals                                       | Italy   | Europe        | Interaction | Observation /Behavioural analysis                     | Looking behaviour: looking overall, referential looking                                                                                                                                                                                               | Dog > handler/owner                             | Observer/experimenter | TEST unsolvable test                              |
| <b>Pirrone (2017)</b>    | Measuring social synchrony and stress in the handler-dog dyad during animal-assisted activities: A pilot study                             | Journal of Veterinary Behavior                | Italy   | Europe        | Interaction | Observation /Behavioural analysis                     | Social synchrony: gaze synchrony, joint attention, and touch synchrony/responsiveness to handler's cue/attention seeking handler or patient/spontaneous physical contact seeking with patients                                                        | Dog <> handler and dog > participant            | Observer/experimenter | DAI/DAI simulation                                |
| <b>Prothmann (2015)</b>  | Analysis of child – dog play behavior in child psychiatry                                                                                  | Anthrozoös                                    | Germany | Europe        | Interaction | Observation /Behavioural analysis                     | Multistage coding system (4 categories: posture, visual contact, behaviour towards dog, behaviours towards handler). Behaviours towards the dog: calling/talking, stroking, hugging/cuddling, invitation to play, distancing                          | Participant > dog                               | Observer/experimenter | DAI/DAI simulation                                |
| <b>Prothmann (2015)</b>  | Preference for, and responsiveness to, people, dogs and objects in children with autism                                                    | Anthrozoös                                    | Germany | Europe        | Interaction | Observation /Behavioural analysis                     | Multistage category system and coding: interaction with the dog (initiation or response: talking to, physical contact, offer to play, response to dog's offer to play)                                                                                | Participant > dog                               | Observer/experimenter | TEST of preference of differential responsiveness |



|                                |                                                                                                                           |                                                           |       |               |              |                                   |                                                                                                                                                                                                                                                                                                                                                        |                     |                         |                      |
|--------------------------------|---------------------------------------------------------------------------------------------------------------------------|-----------------------------------------------------------|-------|---------------|--------------|-----------------------------------|--------------------------------------------------------------------------------------------------------------------------------------------------------------------------------------------------------------------------------------------------------------------------------------------------------------------------------------------------------|---------------------|-------------------------|----------------------|
| <b>Redefer (1989)</b>          | Brief report: Pet-facilitated therapy with autistic children                                                              | Journal of Autism and Developmental Disorders             | USA   | North America | Interaction  | Observation /Behavioural analysis | Social interaction: any instance of verbal or nonverbal behaviour directed to the therapist or dog                                                                                                                                                                                                                                                     | Participant > dog   | Observer/experimenter   | DAI/DAI simulation   |
| <b>Richeson (2003)</b>         | A therapeutic recreation intervention using animal-assisted therapy: effects on the subjective well-being of older adults | Annual in Therapeutic Recreation                          | USA   | North America | Interaction  | Questionnaire/Scale               | AAT Flow Sheet (9 items) includes frequency of child–dog social relationships (6 items: looked at dog, touched dog, spoke to dog, remembered and used dog’s name, engaged in activity with dog, reminisced about own dog). Likert-type responses                                                                                                       | Participant > dog   | Handler and/or observer | DAI/DAI simulation   |
| <b>Richeson (2003)</b>         | Effects of animal-assisted therapy on agitated behaviors and social interactions of older adults with dementia            | American Journal of Alzheimer’s Disease & Other Dementias | USA   | North America | Interaction  | Questionnaire/Scale               | AAT Flow Sheet (9 items) includes frequency of child–dog social relationships (6 items: looked at dog, touched dog, spoke to dog, remembered and used dog’s name, engaged in activity with dog, reminisced about own dog). Likert-type responses                                                                                                       | Participant > dog   | Observer/experimenter   | DAI/DAI simulation   |
| <b>Riggio (2021)</b>           | The dog–owner relationship: Refinement and validation of the Italian c/dors for dog owners and correlation with the laps  | Animals                                                   | Italy | Europe        | Relationship | Questionnaire/Scale               | C/DORS and LAPS                                                                                                                                                                                                                                                                                                                                        | handler/owner > dog | Dpg owner/handler       | Online questionnaire |
| <b>Robino (2021)</b>           | College Student Mental Health in an Animal-Assisted Intervention Program: A Preliminary Study                             | Journal of Creativity in Mental Health                    | USA   | North America | Interaction  | Questionnaire/Scale               | Human–Animal Interaction Scale (HAIS): self-report instrument of 24 items to describe and quantify behaviours performed by human and non-human animals during an episode of interaction. Rating with Likert scale, behaviours performed by humans and by animals. Total score: the higher, the greater quantity of positive human animal interactions. | Dog <> participant  | Participant             | DAI/DAI simulation   |
| <b>Robino (2022)</b>           | Sustained Effects of Animal-Assisted Crisis Response on Stress in School Shooting Survivors                               | Human Animal Interaction Bulletin                         | USA   | North America | Bond         | Questionnaire/Scale               | Center for the Study of Animal Wellness Pet Bonding Scale (CSAW-PBS)                                                                                                                                                                                                                                                                                   | Participant > dog   | Participant             | DAI/DAI simulation   |
| <b>Rodrigo-Claverol (2023)</b> | Human–Animal Bond Generated in a Brief Animal-Assisted Therapy Intervention in Adolescents                                | Animals                                                   | Spain | Europe        | Bond         | Questionnaire/Scale               | Center for the Study of Animal Wellness Pet Bonding Scale (CSAW-PBS)                                                                                                                                                                                                                                                                                   | Participant > dog   | Participant             | DAI/DAI simulation   |

|                              |                                                                                                                                             |                                  |         |               |             |                                                       |                                                                                                                                                                                                              |                                 |                       |                    |
|------------------------------|---------------------------------------------------------------------------------------------------------------------------------------------|----------------------------------|---------|---------------|-------------|-------------------------------------------------------|--------------------------------------------------------------------------------------------------------------------------------------------------------------------------------------------------------------|---------------------------------|-----------------------|--------------------|
|                              | with Mental Health Disorders                                                                                                                |                                  |         |               |             |                                                       |                                                                                                                                                                                                              |                                 |                       |                    |
| <b>Sarrafchi (2022)</b>      | Effect of human-dog interaction on therapy dog stress during an on-campus student stress buster event                                       | Applied Animal Behaviour Science | Canada  | North America | Interaction | Observation /Behavioural analysis                     | Dog ethogram: Interaction with participant (approach or avoid) and owner (interact)                                                                                                                          | Dog > participant/handler/owner | Observer/experimenter | DAI/DAI simulation |
| <b>Sellers (2006)</b>        | The evaluation of an animal assisted therapy intervention for elders with dementia in long-term care                                        | Activities, Adaptation & Aging   | USA     | North America | Interaction | Observation /Behavioural analysis with tool/checklist | Social Behaviour Observation Checklist (SBOC): smile/laugh, leans, looks, touch, and verbalization.                                                                                                          | Participant > dog               | Observer/experimenter | DAI/DAI simulation |
| <b>Thodberg (2016)</b>       | Behavioral Responses of Nursing Home Residents to Visits From a Person with a Dog,a Robot Seal or aToy Cat                                  | Anthrozoös                       | Denmark | Asia          | Interaction | Observation /Behavioural analysis                     | Frequency and duration of physical contact with the animal, talk directed to the animal and the visiting person, and visual contact with the animal or the visiting person. Ethogram reported in the article | Participant > dog               | Observer/experimenter | DAI/DAI simulation |
| <b>Thodberg (2021)</b>       | Dog visits in nursing homes-increase complexity or keep it simple? A randomised controlled study                                            | Plos One                         | Denmark | Europe        | Interaction | Observation /Behavioural analysis                     | Frequency and duration of physical contact and talk directed to the dog                                                                                                                                      | Participant > dog               | Observer/experimenter | DAI/DAI simulation |
| <b>Townsend (2022)</b>       | Reactivation of a Hospital-Based Therapy Dog Visitation Program during the COVID-19 Pandemic                                                | Animals                          | USA     | North America | Interaction | Observation /Behavioural analysis with tool/checklist | Checklist with interactions classified in 3 categories: duration of talk, pet, talk and pet. Total interaction time calculated                                                                               | Participant > dog               | Observer/experimenter | DAI/DAI simulation |
| <b>Turner-Collins (2019)</b> | Does Anthropomorphism of Dogs Affect Pain Perception in Animal-Assisted Interventions? An Exploratory Study                                 | Anthrozoös                       | USA     | North America | Bond        | Questionnaire/Scale                                   | Center for the Study of Animal Wellness Pet Bonding Scale (CSAW-PBS)                                                                                                                                         | Participant > dog               | Participant           | DAI/DAI simulation |
| <b>Uccheddu (2018)</b>       | Assessing behavior and stress in two dogs during sessions of a reading-to-a-dog program for children with pervasive developmental disorders | Dog behavior                     | Italy   | Europe        | Interaction | Observation /Behavioural analysis                     | Frequency and/or duration of 18 dog behaviours, including attention seeking (participant), avoidance (participant), looking at participant or handler                                                        | Dog > participant/handler       | Observer/experimenter | DAI/DAI simulation |

|                               |                                                                                                                                                              |                                   |         |               |                    |                                   |                                                                                                                                                                                                                                                                                                                            |                           |                       |                                                         |
|-------------------------------|--------------------------------------------------------------------------------------------------------------------------------------------------------------|-----------------------------------|---------|---------------|--------------------|-----------------------------------|----------------------------------------------------------------------------------------------------------------------------------------------------------------------------------------------------------------------------------------------------------------------------------------------------------------------------|---------------------------|-----------------------|---------------------------------------------------------|
| <b>Walters Esteves (2008)</b> | Social effects of a dog's presence on children with disabilities                                                                                             | Anthrozoös                        | Florida | North America | Interaction        | Observation /Behavioural analysis | Interactions categorized as positive/negative/verbal/non verbal/initiated/prompted. Within positive non-verbal, for example: touching the dog by petting, throwing/handing treats to the dog, holding the leash, or walking the dog                                                                                        | Participant > dog         | Observer/experimenter | DAI/DAI simulation                                      |
| <b>Wanser (2019)</b>          | Does attachment security to a human handler influence the behavior of dogs who engage in animal assisted activities?                                         | Applied Animal Behaviour Science  | USA     | North America | Bond + interaction | Observation /Behavioural analysis | Attachment style classification (secure base test) + Behavioural states: gazing at the participant, touching the participant, participant proximity-seeking, gazing at the handler, touching the handler, and handler proximity-seeking                                                                                    | Dog > handler/participant | Observer/experimenter | TEST secure base test + DAI/DAI simulation              |
| <b>Wedl (2015)</b>            | Children with Avoidant or Disorganized Attachment Relate Differently to a Dog and to Humans During a Socially Stressful Situation                            | Anthrozoös                        | Germany | Europe        | Interaction        | Observation /Behavioural analysis | Behavioural parameters coded "physical contact with the dog" (stroking, touching, holding the dog), "playing with the dog," "talking to the dog"                                                                                                                                                                           | Participant > dog         | Observer/experimenter | TEST Experimental Trier Social Stress Test for Children |
| <b>Wesenberg (2019)</b>       | Effects of an animal-assisted intervention on social behaviour, emotions, and behavioural and psychological symptoms in nursing home residents with dementia | Psychogeriatrics                  | Germany | Europe        | Interaction        | Observation /Behavioural analysis | Social interaction coded into four subcategories: (i) verbal interaction; (ii) non-verbal interaction–touch; (iii) non-verbal interaction–line of gaze; and (iv) non-verbal interaction–body posture. Further differentiated whether the behaviour was self-directed or directed towards a person, an animal, or an object | Participant > dog         | Observer/experimenter | DAI/DAI simulation                                      |
| <b>Wohlfarth (2014)</b>       | An investigation into the efficacy of therapy dogs on reading performance in 6-7 year old children                                                           | Human-Animal Interaction Bulletin | Germany | Europe        | Interaction        | Observation /Behavioural analysis | Human-dog interaction on a documentation sheet developed for the study. Visual or physical contact to the dog (petting and touching)                                                                                                                                                                                       | Participant > dog         | Observer/experimenter | DAI/DAI simulation                                      |
